# Supplementary material
Source: PubMed Central journal article supplement (PMC6277907)

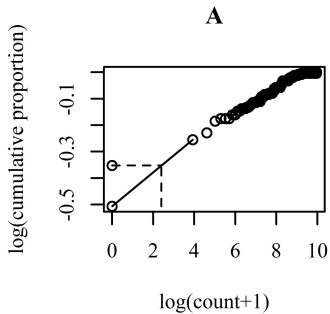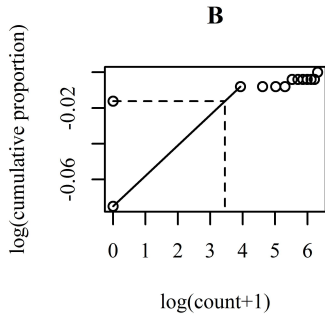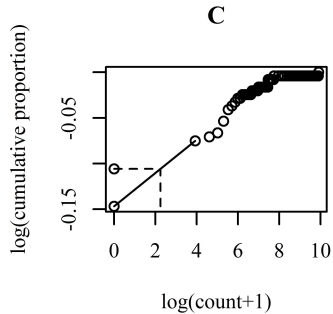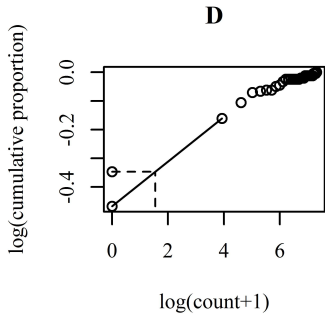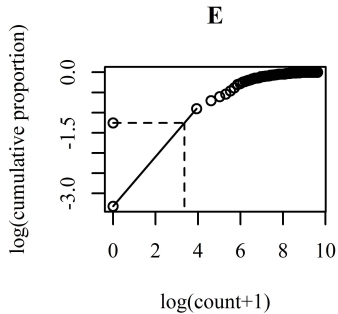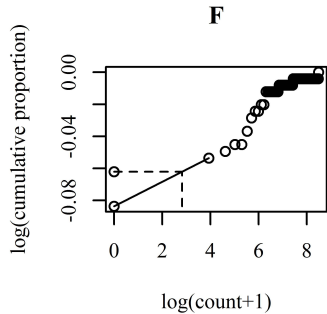

Supplement: NIHMS997100-supplement-Supplementary_003.pdf [file NIHMS997100-supplement-Supplementary_003.pdf]
